# Supplementary material for: PD-L1 Is Not Constitutively Expressed on Tasmanian Devil Facial Tumor Cells but Is Strongly Upregulated in Response to IFN-γ and Can Be Expressed in the Tumor Microenvironment
Source: PubMed Central journal article supplement (PMC5145852; doi:10.3389/fimmu.2016.00581), 2016-12-09
Supplement: data_sheet_1.pdf [file data_sheet_1.pdf]

**Supplementary Table 1. Primers used for amplifying Tasmanian devil DNA and plasmid construction.**

| Name               | Sequence                                                       | Primer use                                                               | Plasmid                | Length | Tm |
|--------------------|----------------------------------------------------------------|--------------------------------------------------------------------------|------------------------|--------|----|
| deB7H1_sig-pep_F   | ATGATTTGGATTTTGCTTGTGC                                         | PD-L1 5' signal peptide                                                  | NA                     | 22     | 54 |
| deB7H1-short_795_R | TTAAAATGTAATACCATGTTTTTTTTCTAAAGC                              | PD-L1 3' based on cDNA ENSSHAT00000003059                                | NA                     | 32     | 54 |
| pAF22_fragment.FOR | agaccacaccaagctgtctagagccgccaccATGATTTGGA<br>TTTTGCTTGTGC      | Amplify PD-L1 with extensions for plasmid construction                   | pAF48 (full-length PD- | 54     | 74 |
| pAF48.REV          | gaagacgcttttagagaccGTCGACTTAAAATGTAATA<br>CCATGTTTTTTTTCTAAAGC | Amplify full-length PD-L1 with extensions for cloning                    | pAF48 (full-length PD- | 57     | 66 |
| pAF38.FOR          | GTTCTTCTGGCTGTCTTTCTTTTTCTGTATCT<br>GTTCCCAAAGAGAAATATAAAACAC  | Amplify PD-L1-ECD with extensions for 6xHis plasmid construction         | pAF38 (secreted        | 57     | 66 |
| pAF38.REV          | CCTCCACTACCTCCACCCCGATTCTTGAGG<br>CTGTCTTAGTTGAT               | Amplify PD-L1-ECD with extensions for 6xHis plasmid construction         | pAF38 (secreted        | 45     | 71 |
| pAF42.FOR          | TGTCACGAATTCGATATCGGACTTTTCTGTAT<br>CTGTTCCCAAAGAG             | Amplify PD-L1-ECD with extensions for human IgG1-Fc plasmid construction | pAF43 (secreted        | 46     | 66 |
| pAF42.REV          | GTGAGTTTTGTCAGATCTAACAGTTCTTGAG<br>GCTGTCTTAGTTGAT             | Amplify PD-L1-ECD with extensions for human IgG1-Fc plasmid construction | pAF43 (secreted        | 46     | 65 |
| pAF36.FOR          | agagaccacaccaagctgtgcccgccaccATGTTCTTCCTT<br>CTCTCCTTTCTGATTGT | amplify PD-L2 with extensions for plasmid construction                   | pAF36 (full-length PD- | 58     | 75 |
| pAF36.REV          | gaagacgcttttagagaccGTCACAAGTTCACACCAGT<br>TCTGC                | amplify full-length PD-L2 with extensions for plasmid construction       | pAF36 (full-length PD- | 43     | 69 |
| dePD1.FOR          | ATGGTGAAAACCGAATATAACCCTTGGCTTTT<br>GGCCAC                     | amplify PD-1, includes start codon                                       | NA                     | 37     | 67 |
| dePD1.REV          | TCAGAGTGGGCAGGATCCAGGTGGGAG                                    | amplify full-length PD-1 includes stop codon                             | NA                     | 27     | 67 |
| pAF24_fragment.FOR | agaccacaccaagctgtctagagccgccaccATGGTGAAAA<br>CCGAATATAACCCT    | amplify PD-1 with extensions for plasmid construction                    | pAF54 (full-length PD- | 55     | 74 |
| pAF53.REV          | gaagacgcttttagagaccGTCGACTCACTTCCGATGG<br>GGAGAGCTG            | amplify full-length PD-1 with extensions for plasmid construction        | pAF54 (full-length PD- | 47     | 72 |
| pAF39.FOR          | GTTCTTCTGGCTGTCTTTCTATGGTGAAAAC<br>CGAATATAACCCTTGG            | Amplify PD-1-ECD with extensions for 6xHis plasmid construction          | pAF38 (secreted        | 46     | 67 |
| pAF39.REV          | CCTCCACTACCTCCACCCCGTTTTTCGGATTG<br>TGCTTGGGTGG                | Amplify PD-1-ECD with extensions for 6xHis plasmid construction          | pAF38 (secreted        | 43     | 74 |
| pAF43.FOR          | GTCACGAATTCGATATCGGCAGTGAAAACCG<br>AATATAACCCTTGGCTTTTG        | Amplify PD-1-ECD with extensions for human IgG1-Fc plasmid construction  | pAF43 (secreted        | 50     | 69 |
| pAF43.REV          | GTGAGTTTTGTCAGATCTAACCTTTTCGGAT<br>TGTGCTTGGGTGGTGA            | Amplify PD-1-ECD with extensions for human IgG1-Fc plasmid construction  | pAF43 (secreted        | 47     | 69 |

|                      |                                                                 |                                                                    |       |    |    |
|----------------------|-----------------------------------------------------------------|--------------------------------------------------------------------|-------|----|----|
| deIFNg_seq.FOR       | GCAAACCTCTTCACAACCTACTTTAATGC                                   | IFN-g sequencing and qPCR                                          | NA    | 27 | 63 |
| deIFNg_seq.REV       | AGCTTTCCTTTGGACTTTGAGG                                          | IFN-g sequencing and qPCR                                          | NA    | 22 | 63 |
| pAF29a.FOR           | GTTCTTCTGGCTGTCTTTCTCAAGTTAACCTA<br>AGAGAAGACATGC               | IFNg 5' insert for pAF29                                           | pAF29 | 45 | 66 |
| pAF29a.REV           | CCTCCACTACCTCCACCCCTGTGTGATTTT<br>TCCTTGGCTTTTGTTTC             | IFNg 3' insert for pAF29                                           | pAF29 | 48 | 72 |
| pAF23_Fragment.FOR   | gaccacaccaagctgtagagccgccaccATGAATTATTC<br>AAGCTACCTCTTAGC      | IFNg 5' insert for pAF23                                           | pAF23 | 57 | 73 |
| pAF23_Fragment.REV   | gaagacgcttttagagaccGTCGACCTACTGTGTGATT<br>TTTCCTTGGC            | IFNg 3' insert for pAF23                                           | pAF23 | 48 | 70 |
| pAF07_Fragment 1.FOR | cgtgaacacgtctcggggggagagaccacaccaag                             | Comet GFP with overlaps for pAF07                                  | pAF07 | 36 | 70 |
| pAF07_Fragment 1.REV | TCGGATCCgcggtatgtttccaagtccacc                                  | Comet GFP with BamHI + devil IgG hinge region<br>overlap for pAF07 | pAF07 | 30 | 66 |
| pAF07_Fragment 2.FOR | ataccgcGGATCCGAGGGCCCCAGTTCCACACC                               | Devil IgG overlap with Comet GFP for pAF07                         | pAF07 | 33 | 72 |
| pAF07_Fragment 2.REV | AGGGGCGATTTAAATTTCCCTCGAGTCATGAA<br>TTCGAGATTGTCCTCTG           | Devil IgG and overlap with IRES for pAF07                          | pAF07 | 48 | 66 |
| pAF07_Fragment 4.FOR | CTTTGAAAAACACGATGATAATATGGCTAGC<br>ATGGATAGCACTGAGAACG          | DsRed with IRES overlap and NheI site for pAF07                    | pAF07 | 50 | 65 |
| pAF07_Fragment 4.REV | agaacaggaagacgcGTCGACTCACTGGAACAGGT<br>GG                       | DsRed with Sall site for pAF07                                     | pAF07 | 37 | 69 |
| pAF07_Fragment3.FOR  | TGACTCGAGGAAATTTAAATCGCCCCTCTCC                                 | IRES with BamHI site for pAF07                                     | pAF07 | 31 | 64 |
| pAF07_Fragment3.REV  | GCTAGCCATATTATCATCGTGTTTTTCAAAG<br>GAAAACCA                     | IRES with ATG-NheI site for pAF07                                  | pAF07 | 39 | 63 |
| pAF07RE_fragment.FOR | atttcaggtgtcgtgaacacgtctcgggggagagaccacaccaagctg                | pAF07 insert for BsaI restriction cloning                          | pAF07 | 49 | 75 |
| pAF07RE_fragment.REV | gatgtgatgagaacaggaagacgcttttagagaccGTCGACTCA<br>CTGGAACAGGTGGTG | pAF07 insert for BsaI restriction cloning                          | pAF07 | 59 | 73 |
| pAF27_SigPep_1.FOR   | gccgccaccATGAATTATTCAAGCTACCTCTTAG<br>C                         | IFNg 5' signal peptide with Kozak-ATG                              | pAF27 | 35 | 66 |
| pAF27_SigPep_1.REV   | caccttctgcagggccgtTTCTAGAGAAAGACAGCCA<br>GAAGAACTCAG            | IFNg 3'                                                            | pAF27 | 49 | 71 |
| pAF27_GFP_2.FOR      | TCTAGAAacggccctgacagaaggtg                                      | IFNg 5' signal peptide with overlap for comet GFP                  | pAF27 | 26 | 63 |
| pAF27_GFP_2_a.REV    | TCCACCCCCGGGgcggtatgtttccaagtccac                               | Comet GFP 3' and G4S-His extension                                 | pAF27 | 33 | 72 |

|                       |                                                                |                                                                 |            |    |    |
|-----------------------|----------------------------------------------------------------|-----------------------------------------------------------------|------------|----|----|
| pAF27_G4S_His_3.FOR   | gaaacataccgcaCCCGGGGAGGTGGAGGTAGTGG<br>AGGTGGAGGTAGTCATCATCACC | Comet GFP 3' and G4S-His extension                              | pAF27      | 58 | 76 |
| pAF27.REV             | gaagacgcttttagagaccGTCGACTCAATGGTGATGG<br>TGATGATGACTACCTCCAC  | pAF27 3' insert                                                 | pAF27      | 57 | 72 |
| pAF27.FOR             | gaccacaccaagctgtgccgccaccATGAATTATTCAAG                        | pAF27 5' insert                                                 | pAF27      | 40 | 70 |
| pAF27_G4S_His_3_a.FOR | acataccgcCCCGGGGGTGGAGGTAGTGGAGGT<br>GGAGGTAGTCATCATCACCATCAC  | Comet GFP 3' and G4S-His extension                              | pAF27      | 57 | 77 |
| pAF27_GFP_2_a.REV     | TCCACCCCCGGGgcggtatgttccaagtccac                               | Comet GFP 3' and G4S-His extension                              | pAF27      | 33 | 72 |
| pFUSE_seq.FOR         | GACCGGCGCCTACCTGAGAT                                           | sequencing primers for the human and mouse pFUSE-Ig-Fc plasmids | sequencing | 20 | 62 |
| pFUSE_seq.REV         | CATCAATGTATCTTATCATGTCTGGCCAG                                  | sequencing primers for the human and mouse pFUSE-Ig-Fc plasmids | sequencing | 29 | 59 |
| pb_EF1a_seq_f         | atcttggtcattctcaagcctcag                                       | Sequencing pHULK piggybac plasmids                              | sequencing | 25 | 59 |
| pb_scaffold_seq_R     | aggctaagtaacatctgtggca                                         | Sequencing pHULK piggybac plasmids                              | sequencing | 24 | 58 |
| PCR-IRES-Fw           | GAAATTTAAATCGCCCCTCTCCC                                        | IRES with 5' extension to avoid GC repeats                      | sequencing | 20 | 57 |
| PCR-IRES-Rv           | ATTATCATCGTGTTTTTTCAA                                          | IRES                                                            | sequencing | 20 | 55 |

**Supplementary Table 2. Blocking capacity of PD-1 and PD-L1 monoclonal antibodies**

| antigen | clone | antibody_ID | target species | host species | antagonist                                                                                           |
|---------|-------|-------------|----------------|--------------|------------------------------------------------------------------------------------------------------|
| PDL1    | 1F8   | PDL1_1F8    | devil          | mouse        | yes, blocks PD1-his to PDL1 20150701 and PD1-Fc to PDL1 but not PDL2 20151105                        |
| PDL1    | 2A11  | PDL1_2A11   | devil          | mouse        | yes, blocks PD1-his to PDL1 20150701 and PD1-Fc to PDL1 but not PDL2 20151105                        |
| PDL1    | 2E4   | PDL1_2E4    | devil          | mouse        | partial block of PD1-His 20150701, does not block PD1-Fc binding to PDL1 or PDL2 20151105.           |
| PDL1    | 2G2   | PDL1_2G2    | devil          | mouse        | no, does not block PDL1 20150701 or PDL2 20151105                                                    |
| PDL1    | 2H5   | PDL1_2H5    | devil          | mouse        | yes, blocks PD1-his to PDL1 20150701 and PD1-Fc to PDL1 but not PDL2 20151105                        |
| PDL1    | 3G4   | PDL1_3G4    | devil          | mouse        | no, does not block PDL1 20150701 or PDL1 and PDL2 20151105                                           |
| PDL1    | 4A10  | PDL1_4A10   | devil          | mouse        | yes, blocks PD1-his to PDL1 20150701 and PD1-Fc to PDL1 but not PDL2 20151105                        |
| PDL1    | 4A12  | PDL1_4A12   | devil          | mouse        | yes, blocks PD1-his to PDL1 20150701 and PD1-Fc to PDL1 but not PDL2 20151105                        |
| PDL1    | 5D11  | PDL1_5D11   | devil          | mouse        | yes, blocks PD1-his to PDL1 20150701 and PD1-Fc to PDL1 but not PDL2 20151105                        |
| PD1     | 1B6   | PD1_1B6     | devil          | mouse        | yes, blocks PD1-his to PDL1 20150701 and PD1-Fc to PDL1 and PDL2 20151105                            |
| PD1     | 1C9   | PD1_1C9     | devil          | mouse        | no. Does not block PD1-His to PDL1 20150701 and PD1-Fc to PDL1 and PDL2 20151105                     |
| PD1     | 3C4   | PD1_3C4     | devil          | mouse        | partial block of PD-1 His and huIgG-Fc to PDL1 but not PDL2                                          |
| PD1     | 3G8   | PD1_3G8     | devil          | mouse        | yes, blocks PD1-his to PDL1 20150701 and PD1-Fc to PDL1 and PDL2 20151105                            |
| PD1     | 4E3   | PD1_4E3     | devil          | mouse        | yes/no. doesn't block PD-1-His 20150701 to PDL1, blocked PD-1-Fc on 20151105 to PDL1 and PDL2        |
| PD1     | 4G1   | PD1_4G1     | devil          | mouse        | yes/no. doesn't block PD-1-His 20150701 to PDL1, blocked PD-1-Fc on 20151105 to PDL1 and PDL2        |
| PD1     | 5A6   | PD1_5A6     | devil          | mouse        | no. Does not block PD1-His to PDL1 20150701 and PD1-Fc to PDL1 and PDL2 20151105                     |
| PD1     | 5F11  | PD1_5F11    | devil          | mouse        | yes/no, doesn't block PD-1-His to PDL2 20150701, blocked PD-1-Fc to PDL1 PDL220151105                |
| PD1     | 7G12  | PD1_7G12    | devil          | mouse        | partial. Blocks PD1-Fc to PDL1 20151105 but not PD1-Fc to PDL2 20151105                              |
| PD1     | 8E1   | PD1_8E1     | devil          | mouse        | partial PD1-His to PDL1 block 20150701 and PD1-Fc to PDL1 20151105, but does not block PDL2 20151105 |

Supplementary Table 3. Summary of histological slides and results.

| individual | antigen | clone | antibody_ID | TD_num | TD_name | tissue      | tumor | slide                    | result                             | positive | strain | sex | age | captive_wild |
|------------|---------|-------|-------------|--------|---------|-------------|-------|--------------------------|------------------------------------|----------|--------|-----|-----|--------------|
| 1          | PD-1    | 3G8   | PD-1_3G8    | 181    | Missy   | tum         | 1     | TD_181_Missy_tum         | negative                           | 0        | DFT1   | F   | 1   | captive      |
| 1          | PD-L1   | 1F8   | PD-L1_1F8   | 181    | Missy   | tum         | 1     | TD_181_Missy_tum         | negative                           | 0        | DFT1   | F   | 1   | captive      |
| 2          | PD-L1   | 1F8   | PD-L1_1F8   | 269    | _       | tum         | 1     | TD_269__tum              | negative                           | 0        | DFT1   | F   | NA  | wild         |
| 3          | PD-1    | 3G8   | PD-1_3G8    | 307    | _       | tum         | 1     | TD_307__tum              | negative                           | 0        | DFT1   | F   | 1   | wild         |
| 3          | PD-L1   | 1F8   | PD-L1_1F8   | 307    | _       | tum         | 1     | TD_307__tum              | 1-3 strong PD-L1+ cells in the tu  | 1        | DFT1   | F   | 1   | wild         |
| 4          | PD-1    | 3G8   | PD-1_3G8    | 316    | Lottie  | spleen-LN   | 0     | TD_316_Lottie_spleen-LN  | NA                                 | NA       | DFT1   | NA  | NA  | captive      |
| 4          | PD-1    | 3G8   | PD-1_3G8    | 316    | Lottie  | LHS-tum     | 1     | TD_316_Lottie_LHS-tum    | negative                           | 0        | DFT1   | NA  | NA  | captive      |
| 4          | PD-L1   | 1F8   | PD-L1_1F8   | 316    | Lottie  | spleen-LN   | 0     | TD_316_Lottie_spleen-LN  | Low numbers of lymphocytes wi      | 1        | DFT1   | NA  | NA  | captive      |
| 4          | PD-L1   | 1F8   | PD-L1_1F8   | 316    | Lottie  | LHS-tum     | 1     | TD_316_Lottie_LHS-tum    | negative                           | 0        | DFT1   | NA  | NA  | captive      |
| 5          | PD-1    | 3G8   | PD-1_3G8    | 318    | Elsie   | tum-29.4.13 | 1     | TD_318_Elsie_tum-29.4.13 | NA                                 | NA       | DFT1   | NA  | NA  | captive      |
| 5          | PD-L1   | 1F8   | PD-L1_1F8   | 318    | Elsie   | tum-29.4.13 | 1     | TD_318_Elsie_tum-29.4.13 | > 20 PD-L1+ between large tum      | 1        | DFT1   | NA  | NA  | captive      |
| 6          | PD-1    | 3G8   | PD-1_3G8    | 374    | _       | spleen-LN   | 0     | TD_374__spleen-LN        | Low numbers of lymphocytes wi      | NA       | DFT1   | NA  | NA  | captive      |
| 6          | PD-L1   | 1F8   | PD-L1_1F8   | 374    | _       | spleen-LN   | 0     | TD_374__spleen-LN        | PD-L1+ cells throughout LN         | 1        | DFT1   | NA  | NA  | captive      |
| 7          | PD-1    | 3G8   | PD-1_3G8    | 467    | RV      | spleen-LN   | 0     | TD_467_RV_spleen-LN      | strong PD-1+ cells mostly cortic   | 1        | DFT2   | M   | 3.5 | wild         |
| 7          | PD-1    | 3G8   | PD-1_3G8    | 467    | RV      | kidney-met  | 1     | TD_467_RV_kidney-met     | DFT2 metastasis to renal cortex    | 0        | DFT2   | M   | 3.5 | wild         |
| 7          | PD-1    | 3G8   | PD-1_3G8    | 467    | RV      | lung-met    | 1     | TD_467_RV_lung-met       | Low numbers of lymphocytes wi      | 1        | DFT2   | M   | 3.5 | wild         |
| 7          | PD-1    | 3G8   | PD-1_3G8    | 467    | RV      | tum1A       | 1     | TD_467_RV_tum1A          | negative                           | 0        | DFT2   | M   | 3.5 | wild         |
| 7          | PD-1    | 3G8   | PD-1_3G8    | 467    | RV      | tum1B       | 1     | TD_467_RV_tum1B          | NA                                 | NA       | DFT2   | M   | 3.5 | wild         |
| 7          | PD-L1   | 1F8   | PD-L1_1F8   | 467    | RV      | spleen-LN   | 0     | TD_467_RV_spleen-LN      | patchy PD-L1+ cells                | 1        | DFT2   | M   | 3.5 | wild         |
| 7          | PD-L1   | 1F8   | PD-L1_1F8   | 467    | RV      | kidney-met  | 1     | TD_467_RV_kidney-met     | negative                           | 0        | DFT2   | M   | 3.5 | wild         |
| 7          | PD-L1   | 1F8   | PD-L1_1F8   | 467    | RV      | lung-met    | 1     | TD_467_RV_lung-met       | 10-20 scattered PD-L1+ cells no    | 1        | DFT2   | M   | 3.5 | wild         |
| 7          | PD-L1   | 1F8   | PD-L1_1F8   | 467    | RV      | tum1A       | 1     | TD_467_RV_tum1A          | negative                           | 0        | DFT2   | M   | 3.5 | wild         |
| 7          | PD-L1   | 1F8   | PD-L1_1F8   | 467    | RV      | tum1B       | 1     | TD_467_RV_tum1B          | negative                           | 0        | DFT2   | M   | 3.5 | wild         |
| 8          | PD-1    | 3G8   | PD-1_3G8    | 500    | _       | T2          | 1     | TD_500__T2               | PD-1+ cells, but no PD-1+ in larg  | 1        | DFT2   | M   | 4   | wild         |
| 8          | PD-L1   | 1F8   | PD-L1_1F8   | 500    | _       | T2          | 1     | TD_500__T2               | Low numbers of plasma cell like    | 1        | DFT2   | M   | 4   | wild         |
| 9          | PD-L1   | 1F8   | PD-L1_1F8   | 504    | _       | T9          | 1     | TD_504__T9               | >20 PD-L1+ cells in glands near    | 1        | DFT1   | F   | 1   | wild         |
| 10         | PD-L1   | 1F8   | PD-L1_1F8   | 505    | _       | LN          | 0     | TD_505__LN               | PD-L1+ cells throughout LN         | 1        | DFT1   | F   | 3   | wild         |
| 10         | PD-L1   | 1F8   | PD-L1_1F8   | 505    | _       | lung        | 0     | TD_505__lung             | single PD-L1+ cell in large tumor  | 1        | DFT1   | F   | 3   | wild         |
| 10         | PD-L1   | 1F8   | PD-L1_1F8   | 505    | _       | T1          | 1     | TD_505__T1               | 3-10 PD-L1+ cells. Near gap in c   | 1        | DFT1   | F   | 3   | wild         |
| 10         | PD-L1   | 1F8   | PD-L1_1F8   | 505    | _       | T2          | 1     | TD_505__T2               | PD-L1+ cells present               | 1        | DFT1   | F   | 3   | wild         |
| 10         | PD-L1   | 1F8   | PD-L1_1F8   | 505    | _       | T3          | 1     | TD_505__T3               | negative, mostly skin tissue in th | 0        | DFT1   | F   | 3   | wild         |
| 11         | PD-L1   | 1F8   | PD-L1_1F8   | 506    | _       | T1          | 1     | TD_506__T1               | negative                           | 0        | DFT1   | F   | 1   | wild         |
| 12         | PD-L1   | 1F8   | PD-L1_1F8   | 512    | _       | LN-met      | 0     | TD_512__LN-met           | There are low numbers of lymph     | 1        | DFT1   | F   | 2-3 | wild         |
| 12         | PD-L1   | 1F8   | PD-L1_1F8   | 512    | _       | kidney-met  | 1     | TD_512__kidney-met       | Low numbers of plasma cells an     | 1        | DFT1   | F   | 2-3 | wild         |
| 12         | PD-L1   | 1F8   | PD-L1_1F8   | 512    | _       | lung-met    | 1     | TD_512__lung-met         | patchy PD-L1+ cells near small t   | 1        | DFT1   | F   | 2-3 | wild         |
| 12         | PD-L1   | 1F8   | PD-L1_1F8   | 512    | _       | T1          | 1     | TD_512__T1               | negative                           | 0        | DFT1   | F   | 2-3 | wild         |
| 12         | PD-L1   | 1F8   | PD-L1_1F8   | 512    | _       | T2          | 1     | TD_512__T2               | strong PD-L1++ in stroma, but c    | 1        | DFT1   | F   | 2-3 | wild         |
| 13         | PD-1    | 3G8   | PD-1_3G8    | 514    | _       | T1          | 1     | TD_514__T1               | 3 PD-1+ cells near a PD-L1+ cel    | 1        | DFT1   | NA  | NA  | wild         |
| 13         | PD-1    | 3G8   | PD-1_3G8    | 514    | _       | T2          | 1     | TD_514__T2               | negative                           | 0        | DFT1   | NA  | NA  | wild         |
| 13         | PD-L1   | 1F8   | PD-L1_1F8   | 514    | _       | lung-met    | 1     | TD_514__lung-met         | 4 PD-L1+ in tumor mass, 4 PD-L     | 1        | DFT1   | NA  | NA  | wild         |
| 13         | PD-L1   | 1F8   | PD-L1_1F8   | 514    | _       | T1          | 1     | TD_514__T1               | 3 PD-L1+ cells in stroma near br   | 1        | DFT1   | NA  | NA  | wild         |
| 13         | PD-L1   | 1F8   | PD-L1_1F8   | 514    | _       | T2          | 1     | TD_514__T2               | negative                           | 0        | DFT1   | NA  | NA  | wild         |
| 14         | PD-1    | 3G8   | PD-1_3G8    | 517    | Merrick | spleen-LN   | 0     | TD_517_Merrick_spleen-LN | PD-1+ in cortical germinal cente   | 1        | DFT1   | M   | 4   | captive      |
| 14         | PD-1    | 3G8   | PD-1_3G8    | 517    | Merrick | T1          | 1     | TD_517_Merrick_T1        | negative                           | 0        | DFT1   | M   | 4   | captive      |
| 14         | PD-L1   | 1F8   | PD-L1_1F8   | 517    | Merrick | spleen-LN   | 0     | TD_517_Merrick_spleen-LN | Less PD-L1+ cells than most LN     | 1        | DFT1   | M   | 4   | captive      |
| 14         | PD-L1   | 1F8   | PD-L1_1F8   | 517    | Merrick | T1          | 1     | TD_517_Merrick_T1        | negative                           | 0        | DFT1   | M   | 4   | captive      |
| 15         | PD-1    | 3G8   | PD-1_3G8    | 518    | Tip     | LHS-mass    | 1     | TD_518_Tip_LHS-mass      | negative                           | 0        | DFT1   | M   | 7   | captive      |
| 15         | PD-L1   | 1F8   | PD-L1_1F8   | 518    | Tip     | LHS-mass    | 1     | TD_518_Tip_LHS-mass      | few PD-L1+ cells                   | 1        | DFT1   | M   | 7   | captive      |
| 16         | PD-1    | 3G8   | PD-1_3G8    | 546    | Stinky  | Kidney      | 0     | TD_546_Stinky_Kidney     | negative                           | 0        | DFT1   | NA  | NA  | captive      |
| 16         | PD-1    | 3G8   | PD-1_3G8    | 546    | Stinky  | LN-A        | 0     | TD_546_Stinky_LN-A       | strong PD-1+ section               | 1        | DFT1   | NA  | NA  | captive      |
| 16         | PD-1    | 3G8   | PD-1_3G8    | 546    | Stinky  | interscap   | 1     | TD_546_Stinky_interscap  | strong PD-1+                       | 1        | DFT1   | F   | NA  | captive      |
| 16         | PD-1    | 3G8   | PD-1_3G8    | 546    | Stinky  | LHS-RumpA   | 1     | TD_546_Stinky_LHS-RumpA  | TILs are PD-1+ in tumor. PRX+ i    | 1        | DFT1   | NA  | NA  | captive      |

|    |       |     |           |     |         |               |   |                             |                                    |    |      |    |    |         |
|----|-------|-----|-----------|-----|---------|---------------|---|-----------------------------|------------------------------------|----|------|----|----|---------|
| 16 | PD-1  | 3G8 | PD-1_3G8  | 546 | Stinky  | LHS-RumpB     | 1 | TD_546_Stinky_LHS-RumpB     | NA                                 | NA | DFT1 | NA | NA | captive |
| 16 | PD-L1 | 1F8 | PD-L1_1F8 | 546 | Stinky  | Kidney        | 0 | TD_546_Stinky_Kidney        | 1 PD-L1+ cell in blood vessel      | 1  | DFT1 | NA | NA | captive |
| 16 | PD-L1 | 1F8 | PD-L1_1F8 | 546 | Stinky  | LN-A          | 0 | TD_546_Stinky_LN-A          | PD-L1+ cells throughout LN         | 1  | DFT1 | NA | NA | captive |
| 16 | PD-L1 | 1F8 | PD-L1_1F8 | 546 | Stinky  | Lung-B        | 0 | TD_546_Stinky_Lung-B        | 1 PD-L1+ cell. Might be other po   | 1  | DFT1 | NA | NA | captive |
| 16 | PD-L1 | 1F8 | PD-L1_1F8 | 546 | Stinky  | interscap     | 1 | TD_546_Stinky_interscap     | few PD-L1+ cells                   | 1  | DFT1 | F  | NA | captive |
| 16 | PD-L1 | 1F8 | PD-L1_1F8 | 546 | Stinky  | LHS-RumpA     | 1 | TD_546_Stinky_LHS-RumpA     | few PD-L1+ cells                   | 1  | DFT1 | NA | NA | captive |
| 16 | PD-L1 | 1F8 | PD-L1_1F8 | 546 | Stinky  | LHS-RumpB     | 1 | TD_546_Stinky_LHS-RumpB     | 4 PD-L1+ cells in tumour, but mi   | 1  | DFT1 | NA | NA | captive |
| 16 | PD-L1 | 1F8 | PD-L1_1F8 | 546 | Stinky  | RHS-T1        | 1 | TD_546_Stinky_RHS-T1        | few PD-L1+ cells, but staining is  | 1  | DFT1 | F  | NA | captive |
| 16 | PD-L1 | 1F8 | PD-L1_1F8 | 546 | Stinky  | RHS-tum       | 1 | TD_546_Stinky_RHS-tum       | strong PD-L1++                     | 1  | DFT1 | F  | NA | captive |
| 16 | PD-L1 | 1F8 | PD-L1_1F8 | 546 | Stinky  | Sh-B1         | 1 | TD_546_Stinky_Sh-B1         | few PD-L1+                         | 1  | DFT1 | F  | NA | captive |
| 16 | PD-L1 | 1F8 | PD-L1_1F8 | 546 | Stinky  | Tum-interscap | 1 | TD_546_Stinky_Tum-interscap | negative                           | 0  | DFT1 | NA | NA | captive |
| 17 | PD-1  | 3G8 | PD-1_3G8  | -   | Oryx    | tum           | 1 | TD___Oryx_tum               | ~10 PD-1+ cells scattered in blo   | 1  | DFT1 | NA | NA | wild    |
| 17 | PD-L1 | 1F8 | PD-L1_1F8 | -   | Oryx    | tum           | 1 | TD___Oryx_tum               | negative                           | 0  | DFT1 | NA | NA | wild    |
| 18 | PD-1  | 3G8 | PD-1_3G8  | -   | Octavio | tum           | 1 | TD___Octavio_tum            | negative                           | 0  | DFT1 | NA | NA | wild    |
| 18 | PD-L1 | 1F8 | PD-L1_1F8 | -   | Octavio | tum           | 1 | TD___Octavio_tum            | cluster of 5-10 PD-L1+ cells in bl | 1  | DFT1 | NA | NA | wild    |
